# Supplementary material for: Identification of Three Significant Genes Associated with Immune Cells Infiltration in Dysfunctional Adipose Tissue-Induced Insulin-Resistance of Obese Patients via Comprehensive Bioinformatics Analysis
Source: Hindawi journal article supplement (doi:10.1155/2021/8820089), 2021-01-22

**Supplemental Table 1.** Basic characteristics of type 2 diabetic obese patients and controls (mean±SD)

|                     | Age        | Gender<br>(M/F) | Weight<br>(kg) | Height<br>(cm) | BMI<br>(kg/m <sup>2</sup> ) | FPG<br>(mmol/L) | HbA1C<br>(%) |
|---------------------|------------|-----------------|----------------|----------------|-----------------------------|-----------------|--------------|
| <b>IS</b><br>(n=5)  | 56±6.51    | 2/3             | 62.5±6.59      | 160.8±9.1      | 24.18±1.55                  | 5.22±0.82       | 4.96±0.12    |
| <b>IRO</b><br>(n=5) | 34.4±11.31 | 3/2             | 110.34±22.21   | 165.6±5.3      | 40.24±8.18**                | 7.02±1.47       | 6.8±0.86**   |

FPG: fasting plasma glucose, Data represent mean ±SD. \*\*P value<0.01 vs. control group.

**Supplemental Table 2.** Summary of primer sequences used for RT-qPCR

| Gene (Mouse)  | Sequence                                                                               |
|---------------|----------------------------------------------------------------------------------------|
| <b>36B4</b>   | Forward: 5' AAG CGC GTC CTG GCA TTG TCT 3'<br>Reverse: 5' CCG CAG GGG CAG CAG TGG T 3' |
| <b>TYROBP</b> | Forward: 5' CCC AAG ATG CGA CTG TTC TTC 3'<br>Reverse: 5' GTC CCT TGA CCT CGG GAG A 3' |
| <b>CSF1R</b>  | Forward: 5' GAC CCT GAA TCT CCC GGA AG 3'<br>Reverse: 5' GGT ACA ACG GTA GGT CCC AG 3' |
| <b>C1QC</b>   | Forward: 5' GGA CGG GCA TGA TGG ACT C 3'<br>Reverse: 5' TTC TGT TTG TAT CGG CCC TCC 3' |

| Gene (human)   | Sequence                                                                                 |
|----------------|------------------------------------------------------------------------------------------|
| <b>18srRNA</b> | Forward: 5' GTA ACC CGT TGA ACC CCA TT 3'<br>Reverse: 5' CCA TCC AAT CGG TAG TAG CG 3'   |
| <b>TYROBP</b>  | Forward: 5' ACT GAG ACC GAG TCG CCT TAT 3'<br>Reverse: 5' ATA CGG CCT CTG TGT GTT GAG 3' |
| <b>CSF1R</b>   | Forward: 5' GGG AAT CCC AGT GAT AGA GCC 3'<br>Reverse: 5' TTG GAA GGT AGC GTT GTT GGT 3' |
| <b>C1QC</b>    | Forward: 5' AGG ATG GGT ACG ACG GAC TG 3'<br>Reverse: 5' GTA AGC CGG GTT CTC CCT TC 3'   |

**Supplemental Table 3: 30 commonly expressed DEGs screened with the criterion of adjust P value < 0.05.**

| Dataset       | GSE26637   |            | GSE55200   |            | GSE27951   |            |
|---------------|------------|------------|------------|------------|------------|------------|
|               | adj.P.Val  | logFC      | adj.P.Val  | logFC      | adj.P.Val  | logFC      |
| <b>AGPAT9</b> | 0.04519139 | -1.9928709 | 0.00240209 | -1.7607205 | 0.0078735  | -2.59138   |
| <b>AZGP1</b>  | 0.00472905 | -2.6933204 | 0.000057   | -1.2010294 | 0.0191697  | -1.5627873 |
| <b>C1QC</b>   | 0.00704368 | 1.68620184 | 0.00105074 | 1.30892911 | 0.00915404 | 1.34165792 |
| <b>CD14</b>   | 0.02903238 | 1.4717209  | 0.00018284 | 1.2502385  | 0.00869382 | 1.60174306 |
| <b>CD163</b>  | 0.0423012  | 1.55662533 | 0.00025533 | 1.92441829 | 0.00439782 | 1.5551218  |
| <b>CHI3L1</b> | 0.01728097 | 1.35174399 | 0.00175412 | 2.38142797 | 0.01040376 | 1.28393556 |
| <b>CPA3</b>   | 0.00470132 | 2.8103774  | 0.00988517 | 1.09096226 | 0.0234259  | 1.24048682 |

|                |            |            |            |            |            |            |
|----------------|------------|------------|------------|------------|------------|------------|
| <b>CSF1R</b>   | 0.04967523 | 1.22549938 | 0.00186747 | 1.06269301 | 0.00566927 | 1.19298158 |
| <b>CTSS</b>    | 0.00868886 | 2.21366745 | 0.00073858 | 1.95602201 | 0.01062991 | 1.13945304 |
| <b>EGFL6</b>   | 0.01797568 | 5.94188898 | 0.0000335  | 4.25984323 | 0.00135512 | 5.76999774 |
| <b>F13A1</b>   | 0.00731403 | 1.92333973 | 0.00105466 | 1.58685523 | 0.00566927 | 1.94490756 |
| <b>GLIPR1</b>  | 0.00806924 | 1.82056229 | 0.00011768 | 1.81202707 | 0.02374759 | 1.0217565  |
| <b>GPR137B</b> | 0.00039253 | 2.59188921 | 0.00063175 | 1.31125336 | 0.00642285 | 1.10709188 |
| <b>GPR183</b>  | 0.0094948  | 1.99241317 | 0.00030686 | 1.59054317 | 0.01093567 | 1.1326671  |
| <b>HPGDS</b>   | 0.02304208 | 1.65643333 | 0.0075545  | 1.39060375 | 0.00419154 | 1.11175674 |
| <b>LYZ</b>     | 0.00256153 | 2.07844913 | 0.0000335  | 2.33646229 | 0.01975614 | 1.20754834 |
| <b>MMP9</b>    | 0.00425476 | 3.60589158 | 0.00045118 | 2.78054382 | 0.0191697  | 1.04911908 |
| <b>MPEG1</b>   | 0.01102319 | 2.09934075 | 0.00108424 | 1.28821919 | 0.00391054 | 1.601917   |
| <b>MRC1</b>    | 0.04861885 | 1.6869311  | 0.00105245 | 1.4993624  | 0.00363163 | 1.78570942 |
| <b>MS4A4A</b>  | 0.00459704 | 2.43189743 | 0.01654572 | 1.26916719 | 0.00536005 | 1.5622467  |
| <b>MS4A6A</b>  | 0.00980783 | 1.68148543 | 0.00152616 | 1.35482459 | 0.00306827 | 1.27517444 |
| <b>NCF4</b>    | 0.01890602 | 1.10276741 | 0.00069763 | 1.0431129  | 0.00364892 | 1.27080062 |
| <b>RASSF2</b>  | 0.01042758 | 1.89963848 | 0.0000366  | 1.45417735 | 0.02702299 | 1.04251308 |
| <b>RNASE6</b>  | 0.00301195 | 1.70196547 | 0.00272933 | 1.06711815 | 0.00364892 | 1.5035469  |
| <b>SFRP4</b>   | 0.01697967 | 2.98620636 | 0.00066859 | 2.08400676 | 0.01040376 | 1.69665736 |
| <b>SIGLEC1</b> | 0.00961541 | 1.15186016 | 0.00062177 | 1.14549075 | 0.00364892 | 1.1222956  |
| <b>SLIT2</b>   | 0.00384933 | 1.2495788  | 0.00000363 | 1.41701056 | 0.00569882 | 1.03757892 |
| <b>TNMD</b>    | 0.00473808 | 2.16296092 | 0.00077847 | 1.82611576 | 0.02066304 | 1.30645022 |
| <b>TYROBP</b>  | 0.00425476 | 2.25225615 | 0.00025359 | 1.96352148 | 0.01040376 | 1.52437288 |
| <b>VSIG4</b>   | 0.01342969 | 2.50974512 | 0.00037849 | 1.77386698 | 0.00442355 | 1.70864357 |

**Supplemental Table 4: The 15 top common expressed DEGs across three datasets measured by three degrees in Cytoscape.**

| <b>Rank</b> | <b>Name</b> | <b>Degree Score</b> | <b>Closeness Score</b> | <b>MNC Score</b> |
|-------------|-------------|---------------------|------------------------|------------------|
| <b>1</b>    | TYROBP      | 17                  | 17.5                   | 17               |
| <b>2</b>    | CSF1R       | 16                  | 15.5                   | 13               |
| <b>2</b>    | C1QC        | 16                  | 15                     | 12               |
| <b>4</b>    | CD163       | 11                  | 15                     | 12               |
| <b>5</b>    | MS4A6A      | 10                  | 14                     | 10               |
| <b>5</b>    | VSIG4       | 10                  | 14                     | 10               |
| <b>7</b>    | CD14        | 9                   | 13.5                   | 9                |
| <b>7</b>    | MRC1        | 9                   | 13.5                   | 9                |
| <b>9</b>    | F13A1       | 8                   | 13                     | 8                |
| <b>9</b>    | MS4A4A      | 8                   | 13                     | 8                |
| <b>9</b>    | SIGLEC1     | 8                   | 13                     | 8                |
| <b>12</b>   | MMP9        | 7                   | 12.5                   | 7                |
| <b>12</b>   | LYZ         | 7                   | 12.5                   | 7                |
| <b>12</b>   | CTSS        | 7                   | 12.5                   | 7                |
| <b>15</b>   | RNASE6      | 5                   | 11.5                   | 5                |

Supplemental Table 5 Node genes measured in three indexes of genes in module A

| Gene    | Betweenness | Closeness | Degree |
|---------|-------------|-----------|--------|
| CSF1R   | 3.22857     | 9.5       | 12     |
| TYROBP  | 2.37619     | 10        | 10     |
| C1QC    | 2.37619     | 10        | 10     |
| VSIG4   | 1.79048     | 9.5       | 10     |
| CD14    | 1.55714     | 9.5       | 9      |
| MRC1    | 1.30476     | 9         | 9      |
| F13A1   | 0.98571     | 9         | 8      |
| SIGLEC1 | 0.98571     | 9         | 8      |
| MS4A6A  | 1.01905     | 8.5       | 8      |
| CD163   | 1.10476     | 8.5       | 7      |
| MS4A4A  | 1.27143     | 8.5       | 7      |

Supplemental Figure 1 :Downregulation of hub genes in IS improving weight-maintenance phase in GSE35411(\*P value< 0.05).

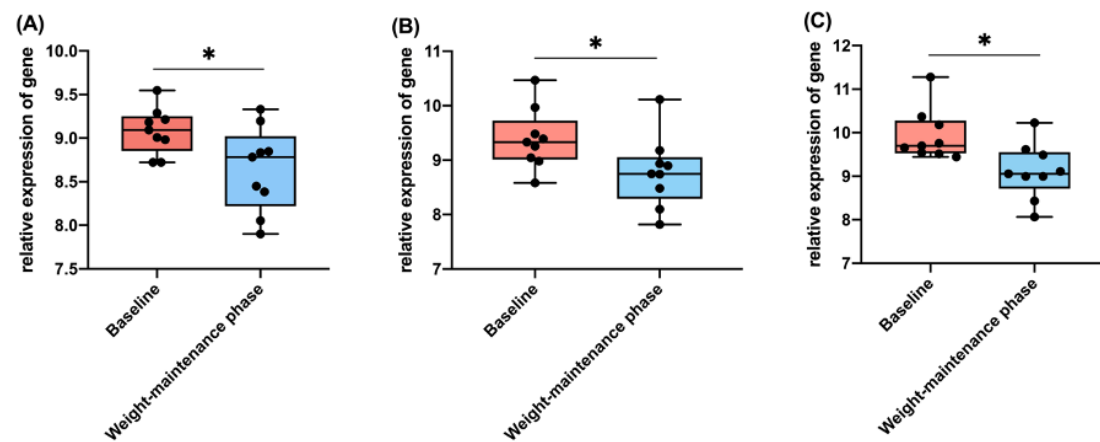

Supplement: f1 [file 8820089.f1.pdf]
